# Supplementary material for: Comprehensive Analysis of Soybean Mosaic Virus P3 Protein Interactors and Hypersensitive Response-Like Lesion-Inducing Protein Function
Source: PubMed Central journal article supplement (PMC6678280; doi:10.3390/ijms20143388), 2019-07-10
Supplement: ijms-20-03388-s001.pdf [file ijms-20-03388-s001.pdf]

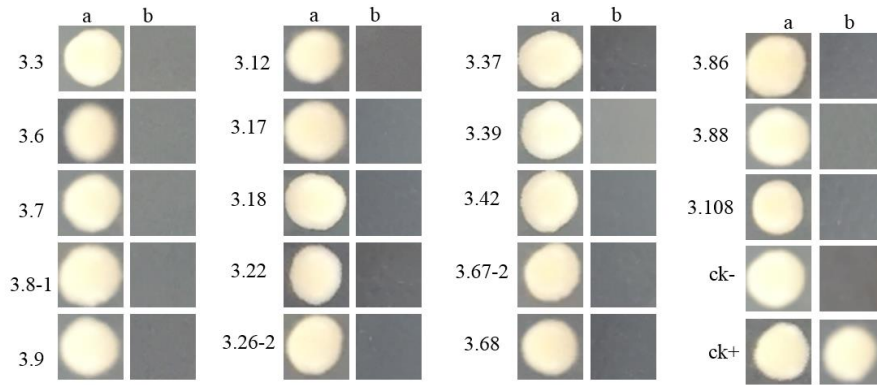

**Figure S1.** Determination of autonomous activity of candidate proteins. Each candidate protein was co-transformed with pBT3. ck+ is the positive control contained pCCW-Alg5 and pAI-Alg5, ck- is the negative control contained pCCW-Alg5 and pBT3. Yeast cell grown on dropout  $SD^{-Leu-Trp}$  medium (a), which corresponded to cells containing the plasmids. Yeast cells grown on dropout  $SD^{-Leu-Trp-His}$  medium to determine the autonomous activity (b).

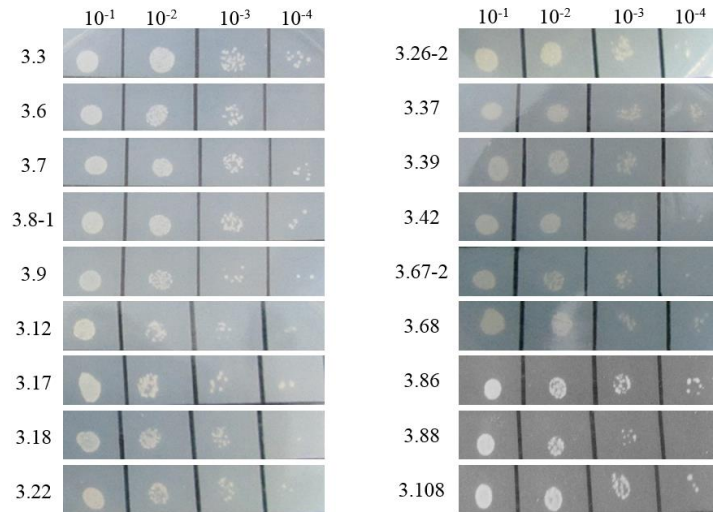

**Figure S2.** Determination of the interaction strength of each candidate proteins with P3. Transformants containing the bait and prey plasmids were identified based on their growth on dropout the interaction strength was detected on  $SD^{-Leu-Trp-His-Ade}$  medium, each drop concentration ranged from  $10^{-1}$ ,  $10^{-2}$ ,  $10^{-3}$  to  $10^{-4}$ .

**Table S1** BLAST analysis of yeast two-hybrid results using P3 as bait to screen the SMV-infected soybean cDNA library

| GenBank No.    | Protein name                                                           | Characteristics                                                                                                                                                    | Homology | Clone number | Functional classification | Cloned sequence/Full length |
|----------------|------------------------------------------------------------------------|--------------------------------------------------------------------------------------------------------------------------------------------------------------------|----------|--------------|---------------------------|-----------------------------|
| NM_001362305   | Mitochondrial import inner membrane translocase, subunit Tim17/22(Tim) | The pre-protein translocase of the mitochondrial outer membrane (Tom) allows the import of pre-proteins from the cytoplasm.                                        | 100%     | 1            | Transport                 | 100%                        |
| XP_002523677.1 | Zinc transporter (ZIP)                                                 | ZRT IRT-like Protein was predicted to be a divalent heavy-metal cations transporter mainly inorganic ion transport and metabolism, also the chloroplast precursor. | 96%      | 4            | Transport                 | 51.44%                      |
| XM_003612815.2 | Hypothetical protein aralydraft_914922 (SNARE)                         | SNARE associated Golgi protein                                                                                                                                     | 85%      | 1            | Transport                 | 97%                         |
| XP_002865943.1 | Hypothetical protein aralydraft_495363 (V-ATPase)                      | Endoplasmic reticulum-based factor for assembly of V-ATPase                                                                                                        | 66%      | 1            | Transport                 | 43.98%                      |
| XM_003542673.3 | Putative plastid triose phosphate translocator (PTPT)                  | arboxylate/Amino Acid AmineTransporter                                                                                                                             | 100%     | 1            | Transport                 | 7.13%                       |
| XP_002872953   | Hypothetical protein aralydraft_912203 (MIP)                           | Major intrinsic protein (MIP) superfamily. Members of the MIP superfamily function as membrane channels that selectively transporter,                              | 98%      | 3            | Transport                 | 100%                        |

| GenBank No.    | Protein name                                       | Characteristics                                                                                                                                                                                                                                                                                                                                                                                                                                                                                                                                              | Homology | Clone number | Functional classification | Cloned sequence/Full length |
|----------------|----------------------------------------------------|--------------------------------------------------------------------------------------------------------------------------------------------------------------------------------------------------------------------------------------------------------------------------------------------------------------------------------------------------------------------------------------------------------------------------------------------------------------------------------------------------------------------------------------------------------------|----------|--------------|---------------------------|-----------------------------|
| NM_001358269.1 | Quaporin PIP-type 7a (PIP 7a)                      | <p>small neutral molecules, and ions out of and between cells.</p> <p>Major intrinsic protein</p>                                                                                                                                                                                                                                                                                                                                                                                                                                                            | 96%      | 1            | Transport                 | 100%                        |
| XM_003555882.3 | Sec-independent protein translocase protein (TatC) | <p>Double fertilization forming a zygote and endosperm, intracellular protein transmembrane transport, protein transport by the Tat complex, thylakoid membrane organization.</p> <p>The Major Facilitator Superfamily (MFS) is a large and diverse group of secondary transporters that includes uniporters, symporters, and antiporters. MFS proteins facilitate the transport across cytoplasmic or internal membranes of a variety of substrates including ions, sugar phosphates, drugs, neurotransmitters, nucleosides, amino acids, and peptides.</p> | 98%      | 1            | Transport                 | 84%                         |
| AAW51884.1     | Nitrate and chloride transporter(NCT)              | <p>facilitate the transport across cytoplasmic or internal membranes of a variety of substrates including ions, sugar phosphates, drugs, neurotransmitters, nucleosides, amino acids, and peptides.</p>                                                                                                                                                                                                                                                                                                                                                      | 97%      | 1            | Transport                 | 50.25%                      |

| GenBank No.    | Protein name                                               | Characteristics                                                                                                                                                                           | Homology | Clone number | Functional classification | Cloned sequence/Full length |
|----------------|------------------------------------------------------------|-------------------------------------------------------------------------------------------------------------------------------------------------------------------------------------------|----------|--------------|---------------------------|-----------------------------|
| XM_003519194   | Anion transporter 4 (AT4)                                  | The component of a membrane consisting of the gene products and protein complexes having at least some part of their peptide sequence embedded in the hydrophobic region of the membrane. | 97%      | 1            | Transport                 | 88%                         |
| XM_006593382   | SECY/SEC61- $\alpha$ family member                         | The directed movement of proteins into, out of or within a cell, or between cells, by means of some agent such as a transporter or pore.                                                  | 96%      | 1            | Transport                 | 75.68%                      |
| NM_001254098.2 | Plant specific mitochondrial import receptor subunit TOM20 | A large complex of the mitochondrial outer membrane that mediates transport of proteins into all mitochondrial compartments.                                                              | 99%      | 1            | Protein transport         | 38.07%                      |
| XM_003534590.3 | Vacuolar-sorting receptor 1 (VSR1)                         | Protein targeting to vacuole, involved in calcium ion binding.                                                                                                                            | 100%     | 1            | Protein transport         | 60.75%                      |
| XM_006600068.2 | Elongation factor 1A (EF1A)                                | SMV resistance-related protein                                                                                                                                                            | 98%      | 5            | Defense                   | 100%                        |
| NM_001317468.1 | Tetraspanin-8-like (TET8)                                  | Defense response to Gram-negative bacterium                                                                                                                                               | 99%      | 1            | Defense                   | 100%                        |
| XM_003545722.3 | PR1a precursor                                             | Contains SCP-like extracellular protein                                                                                                                                                   | 94%      | 2            | Defense                   | 75.48%                      |

| GenBank No.    | Protein name                           | Characteristics                                                                                                                                                                                                                                                                                                                                                                                                                                                   | Homology | Clone number | Functional classification | Cloned sequence/Full length |
|----------------|----------------------------------------|-------------------------------------------------------------------------------------------------------------------------------------------------------------------------------------------------------------------------------------------------------------------------------------------------------------------------------------------------------------------------------------------------------------------------------------------------------------------|----------|--------------|---------------------------|-----------------------------|
| XM_006586752.2 | Actin-depolymerizing factor 2 (ADF2)   | domain and belongs to PR-1 like subfamily. The wider family of SCP containing proteins includes plant pathogenesis-related protein 1 (PR-1), which accumulates after infections with pathogens, and may act as an anti. Actin depolymerisation factor/cofilin-like domains; present in a family of essential eukaryotic actin regulatory proteins; these proteins enhance the turnover rate of actin and interact with actin monomers as well as actin filaments. | 100%     | 1            | Defense                   | 100%                        |
| NM_001248058.1 | Protease inhibitor                     | Predicted to encode a PR (pathogenesis-related) protein. Belongs to the plant defensin (PDF) family. Defense response to fungus,                                                                                                                                                                                                                                                                                                                                  | 99%      | 1            | Defense                   | 85.3%                       |
| AAC49975.1     | Hypersensitive response like (HR-like) | HR-like protein ables to induce HR-like lesions and was associated with the hypersensitive response                                                                                                                                                                                                                                                                                                                                                               | 68%      | 4            | Resistance related        | 100%                        |

| GenBank No.     | Protein name                            | Characteristics                                                                                                                                                                                                                                                                                                                                                                                                   | Homology | Clone number | Functional classification | Cloned sequence/Full length |
|-----------------|-----------------------------------------|-------------------------------------------------------------------------------------------------------------------------------------------------------------------------------------------------------------------------------------------------------------------------------------------------------------------------------------------------------------------------------------------------------------------|----------|--------------|---------------------------|-----------------------------|
| Glyma.10G035300 | HR-like lesion-inducing (HR-lesion)     | (HR) pathway of defense against plant pathogens.<br>HR-like lesion-inducing protein-related                                                                                                                                                                                                                                                                                                                       | 99%      | 1            | Resistance related        | 100%                        |
| AAR26001.1      | Endo-1,3-beta-glucanase                 | Differential Regulation of beta-1,3-Glucanase<br>Messenger RNAs in response to Pathogen Infection                                                                                                                                                                                                                                                                                                                 | 97%      | 4            | Resistance related        | 100%                        |
| NM_001255733.2  | Ubiquitin-conjugating enzyme 32 (UBC32) | Involved in plant disease resistance                                                                                                                                                                                                                                                                                                                                                                              | 99%      | 1            | Resistance related        | 100%                        |
| NM_001249173.3  | Photosystem II subunit X(PSBX)          | A photosystem that contains a pheophytin-quinone reaction center with associated accessory pigments and electron carriers. In cyanobacteria and chloroplasts, in the presence of light, PSII functions as a water-plastoquinone oxidoreductase, transferring electrons from water to plastoquinone, whereas other photosynthetic bacteria carry out an oxygenic photosynthesis and oxidize other compounds to re- | 99%      | 1            | Photosynthesis            | 100%                        |

| GenBank No.    | Protein name                        | Characteristics                                                                                                                                                                                                                                                                                                                                                                                                                                              | Homology | Clone number | Functional classification | Cloned sequence/Full length |
|----------------|-------------------------------------|--------------------------------------------------------------------------------------------------------------------------------------------------------------------------------------------------------------------------------------------------------------------------------------------------------------------------------------------------------------------------------------------------------------------------------------------------------------|----------|--------------|---------------------------|-----------------------------|
| XP_002521096.1 | Cytochrome B5 isoform 1(Cyt B5)     | <p>reduce the photoreaction center.</p> <p>Cytochrome b5-like Heme/Steroid binding domain.</p> <p>Encodes for the 10 kdaPsbR subunit of photosystem II (PSII). This subunit appears to be involved in the stable assembly of PSII, particularly that of the oxygen-evolving complex subunit PsbP. Mutants defective in this gene have reduced amounts of subunits PsbP and PsbQ in PSII. In turn, assembly of PsbR is dependent on the presence of PsbJ.</p> | 99%      | 2            | Photosynthesis            | 100%                        |
| ABC46708.1     | Photosystem II subunit R ( PSBR)    | <p>Encodes one of the 36 carboxylate clamp (CC)-tetratricopeptide repeat (TPR) proteins (Prasad 2010, Pubmed ID: 20856808). Functions as a chaperone receptor at the chloroplast outer envelope, mediating Hsp70-dependent protein</p>                                                                                                                                                                                                                       | 90%      | 6            | Photosynthesis            | 0%                          |
| XM_006592304.2 | Tetratricopeptide repeat (TPR)-like | <p>Encodes one of the 36 carboxylate clamp (CC)-tetratricopeptide repeat (TPR) proteins (Prasad 2010, Pubmed ID: 20856808). Functions as a chaperone receptor at the chloroplast outer envelope, mediating Hsp70-dependent protein</p>                                                                                                                                                                                                                       | 99%      | 2            | Photosynthesis            | 19.33%                      |

| GenBank No.    | Protein name                    | Characteristics                                                                                                                                                                                                                                                                                                                                                                                                       | Homology | Clone number | Functional classification | Cloned sequence/Full length |
|----------------|---------------------------------|-----------------------------------------------------------------------------------------------------------------------------------------------------------------------------------------------------------------------------------------------------------------------------------------------------------------------------------------------------------------------------------------------------------------------|----------|--------------|---------------------------|-----------------------------|
| XP_002523677.1 | Copper response defect1 (CRD1 ) | targeting to chloroplasts. It has been localized to the ER membrane, interacts with the Sec translocon, and has a potential function in post-translational protein transport into the ER. The mRNA is cell-to-cell mobile.<br>Encodes a putative ZIP protein with varying mRNA accumulation in leaves, stems and roots.<br>Has a consensus carboxylate-bridged di-iron binding site. The mRNA is cell-to-cell mobile. | 88%      | 1            | DNA binding               | 57.25%                      |
| XM_006605908.2 | Stress enhanced protein 1(SEP1) | Encodes a stress enhanced protein that localizes to the thylakoid membrane and whose mRNA is upregulated in response to high light intensity. It may be involved in chlorophyll binding.                                                                                                                                                                                                                              | 94%      | 1            | Chlorophyll binding       | 80.89%                      |
| NM_001252782   | Reticulon family protein        | VIRB2-interacting protein 2                                                                                                                                                                                                                                                                                                                                                                                           | 94%      | 1            | Protein binding           | 79.22%                      |
| XM_003543121.3 | 60S ribosomal protein L18a      | Integral component of membrane                                                                                                                                                                                                                                                                                                                                                                                        | 99%      | 1            | Protein binding           | 100%                        |



| GenBank No.    | Protein name                       | Characteristics                                                                                                                                                                                                                                                               | Homology | Clone number | Functional classification | Cloned sequence/Full length |
|----------------|------------------------------------|-------------------------------------------------------------------------------------------------------------------------------------------------------------------------------------------------------------------------------------------------------------------------------|----------|--------------|---------------------------|-----------------------------|
| NM_001248577.1 | Metallothionein 2B (MT2B)          | Interacting selectively and non-covalently with any metal ion. Cysteine-rich protein with copper-binding activity.<br>Selenoprotein. Rdx type; Functions in: selenium binding; Involved in: cell redox homeostasis; Located in: endoplasmic reticulum, plasma membrane.       | 100%     | 1            | Biological Process        | 100%                        |
| XM_006596365.2 | Selenoprotein-related (SELT)       | The protein ubiquitination, has ATP binding, ubiquitin protein ligase activity, ubiquitin protein ligase binding and ubiquitin-protein transferase activity.                                                                                                                  | 98%      | 2            | Cell redox homeostasis    | 66.63%                      |
| NM_001255733.2 | Ubiquitin-conjugating E2 (UBC2)    | Encodes a member of the ankyrin repeat protein. Localized in the endoplasmic reticulum. A translocon complex that contains a core heterotrimer of conserved alpha, beta and gamma subunits, and may contain additional proteins (translocon-associated proteins or traps); in | 100%     | 4            | Protein degradation       | 22.01%                      |
| XM_014773853.1 | Ankyrin like protein(ALP)          |                                                                                                                                                                                                                                                                               | 68%      | 1            | Protein interaction       | 47.45%                      |
| XM_003522001   | Sec61 translocon complex (Sec61TC) |                                                                                                                                                                                                                                                                               | 99%      | 1            | Protein synthesis         | 100%                        |

| GenBank No. | Protein name              | Characteristics                                                                                                                                                                                                                                                                                                                                                                                                                                                                                                                                                                                                                                                                              | Homology | Clone number | Functional classification | Cloned sequence/Full length |
|-------------|---------------------------|----------------------------------------------------------------------------------------------------------------------------------------------------------------------------------------------------------------------------------------------------------------------------------------------------------------------------------------------------------------------------------------------------------------------------------------------------------------------------------------------------------------------------------------------------------------------------------------------------------------------------------------------------------------------------------------------|----------|--------------|---------------------------|-----------------------------|
| AK244083    | 40S ribosomal protein S19 | <p>budding yeast the core proteins are Sec61p, Sbh1p, and Sss1p. The Sec61 translocon complex functions in cotranslational and posttranslational translocation events. The cellular metabolic process in which a protein is formed, using the sequence of a mature mRNA molecule to specify the sequence of amino acids in a polypeptide chain. Translation is mediated by the ribosome, and begins with the formation of a ternary complex between aminoacylated initiator methionine tRNA, GTP, and initiation factor 2, which subsequently associates with the small subunit of the ribosome and an mRNA. Translation ends with the release of a polypeptide chain from the ribosome.</p> | 98%      | 1            | Basal                     | 51.85%                      |

| GenBank No.    | Protein name                   | Characteristics | Homology | Clone number | Functional classification | Cloned sequence/Full length |
|----------------|--------------------------------|-----------------|----------|--------------|---------------------------|-----------------------------|
| XM_006574623.2 | Chaperone-like protein of POR1 | Unknown         | 99%      | 1            |                           | 77.78%                      |
| XM_014776821.1 | Trab family protein            | Unknown         | 98%      | 1            |                           | 93%                         |
| KM407510       | Unknown                        | Unknown         | 96%      | 1            |                           | 100%                        |
| BT091280.1     | Unknown                        | Unknown         | 99%      | 1            |                           | 100%                        |
| AK245224       | Unknown                        | Unknown         | 99%      | 1            |                           | 0.01%                       |
| ACU20654.1     | Unknown                        | Unknown         | 97%      | 1            |                           | 100%                        |
| BT096280       | Unknown                        | Unknown         | 99%      | 1            |                           | 100%                        |
| AK287352       | Unknown                        | Unknown         | 99%      | 1            |                           | 100%                        |
| EF210198       | Unknown                        | Unknown         | 88%      | 1            |                           | 16.89%                      |
| AK245441.1     | Unknown                        | Unknown         | 100%     | 1            |                           | 55.80%                      |
| KF170378       | Unknown                        | Unknown         | 90%      | 1            |                           | 75.36%                      |
| ACU23929       | Unknown                        | Unknown         | 90%      | 1            |                           | 89.47%                      |
| KU904418       | Unknown                        | Unknown         | 94%      | 1            |                           | 0%                          |
| XM_003553097   | Unknown                        | Unknown         | 100%     | 1            |                           | 100%                        |

Table S2. Primer sequence

| Gene name | Primer sequence (5'→3')                        |
|-----------|------------------------------------------------|
| GmHRLI F  | TTTGTACAAGAAAGCTGGGTCATAGGTTTTTGTTTTGGGAACCTTC |
| GmHRLI R  | AGTTTGTACAAAAAAGCAGGCTTCATGGCGTTCTCTTCTTTCTCG  |
| qHRLI F   | TCTAAAGCTGGCTTCA                               |
| qHRLI R   | GGAGTAGCAATCATTGA                              |
| SMV-P3 F  | ATTAACAAGGCCATTACGGCCGGGAAGTGCAACAAAGGATGA     |

---

SMV-P3 R

AACTGATTGGCCGAGGCGGCCCCCTGTGCGGAGACATCTTCTGA

Tubulin F

GGAGTTCACAGAGGCA GAG

Tubulin R

CACTTACGCATCACATAGCA

pPR3-N F

GTCGAAAATTCAAGACAAGG

pPR3-N R

AAGCGTGACATAACTAATTAC

---
